# Supplementary material for: Piscine Orthoreovirus-1 (PRV-1) Has Been Present in Chilean Salmon Aquaculture since at Least 1994
Source: MDPI journal article supplement (doi:10.3390/fishes8050229), 2023-04-26
Supplement: s1 [file s1]

# Piscine Orthoreovirus-1 (PRV-1) Has Been Present in Chilean Salmon Aquaculture since at Least 1994

Marco Rozas-Serri \*, Ricardo Ildefonso, Victoria Jaramillo, Estefanía Peñaloza, Camila Leiva, Soraya Barrientos, Darling Coñuecar, Lucerina Maldonado, Ariel Muñoz, Andrea Peña, Felipe Aranis and Carolina Senn

Pathovet Labs SpA., Puerto Montt 5480000, Chile; ricardo.ildefonso@pathovet.cl (R.I.); victoria.jaramillo@pathovet.cl (V.J.); estefania.penaloza@pathovet.cl (E.P.); camila.leiva@pathovet.cl (C.L.); soraya.barrientos@pathovet.cl (S.B.); darling.conuecar@pathovet.cl (D.C.); lucerina.maldonado@pathovet.cl (L.M.); ariel.munoz@pathovet.cl (A.M.); andrea.pena@pathovet.cl (A.P.); felipe.aranis@pathovet.cl (F.A.); carolina.senn@pathovet.cl (C.S.)

\* Correspondence: marco.rozas@pathovet.cl

**Table S1.** Results of hsCRC, IHC PRV, and RT-qPCR for PRV-1, PRV-2, PRV-3, ISAV, and *P. salmonis* in each FFPE sample analyzed (individual fish). Negative (–)

| ID# | Atrium | Ventricle         |                   |                    |                   |                   |              |       |       | hsC<br>RC | IHC<br>PRV | RT-qPCR |      |                 |              |   |
|-----|--------|-------------------|-------------------|--------------------|-------------------|-------------------|--------------|-------|-------|-----------|------------|---------|------|-----------------|--------------|---|
|     |        | Epicardium        | Stratum compactum | Stratum sponsiosum |                   | Endocardium       |              | PRV-1 | PRV-2 |           |            | PRV-3   | ISAV | P. salmo<br>nis |              |   |
|     |        | Mononuclear cells | Mononuclear cells | Cell degeneration  | Mononuclear cells | Cell degeneration | Hyperplasia  |       |       |           |            |         |      |                 | Thrombosis   |   |
|     |        | infiltration      | infiltration      | infiltration       | infiltration      | infiltration      | infiltration |       |       |           |            |         |      |                 | infiltration |   |
| 1   | 0      | 0                 | 0                 | 0                  | 0                 | 0                 | 1            | 0     | 0     | 0.13      | –          | –       | –    | –               | –            | – |
| 2   | 0      | 0                 | 0                 | 0                  | 0                 | 0                 | 0            | 0     | 0     | 0.00      | –          | –       | –    | –               | –            | – |
| 3   | 0      | 0                 | 0                 | 1                  | 0                 | 1                 | 1            | 0     | 0     | 0.40      | –          | –       | –    | –               | –            | – |
| 4   | 0      | 0                 | 0                 | 0                  | 0                 | 0                 | 0            | 0     | 0     | 0.00      | –          | –       | –    | –               | –            | – |
| 5   | 0      | 0                 | 0                 | 0                  | 0                 | 0                 | 0            | 0     | 0     | 0.00      | –          | –       | –    | –               | –            | – |
| 6   | 0      | 0                 | 1                 | 1                  | 0                 | 0                 | 0            | 0     | 0     | 0.32      | –          | –       | –    | –               | –            | – |
| 7   | 0      | 0                 | 0                 | 0                  | 0                 | 0                 | 0            | 0     | 0     | 0.00      | –          | –       | –    | –               | –            | – |
| 8   | 0      | 0                 | 0                 | 0                  | 0                 | 1                 | 0            | 0     | 0     | 0.13      | –          | –       | –    | –               | –            | – |
| 9   | 0      | 0                 | 0                 | 0                  | 0                 | 0                 | 0            | 0     | 0     | 0.00      | –          | –       | –    | –               | –            | – |
| 10  | 0      | 0                 | 0                 | 0                  | 0                 | 0                 | 0            | 0     | 1     | 0.02      | –          | –       | –    | –               | –            | – |
| 11  | 0      | 0                 | 0                 | 0                  | 1                 | 0                 | 1            | 0     | 0     | 0.27      | –          | –       | –    | –               | –            | – |
| 12  | 0      | 0                 | 0                 | 0                  | 1                 | 0                 | 1            | 0     | 0     | 0.27      | –          | –       | –    | –               | –            | – |
| 13  | 0      | 0                 | 0                 | 0                  | 0                 | 0                 | 1            | 0     | 0     | 0.13      | –          | –       | –    | –               | –            | – |
| 14  | 0      | 0                 | 0                 | 0                  | 0                 | 0                 | 1            | 0     | 0     | 0.13      | –          | –       | –    | –               | –            | – |
| 15  | 0      | 0                 | 0                 | 0                  | 0                 | 0                 | 1            | 0     | 0     | 0.13      | –          | –       | –    | –               | –            | – |
| 16  | 0      | 0                 | 0                 | 0                  | 1                 | 1                 | 1            | 0     | 0     | 0.40      | –          | –       | –    | –               | –            | – |
| 17  | 0      | 0                 | 0                 | 0                  | 1                 | 1                 | 1            | 0     | 0     | 0.40      | –          | –       | –    | –               | –            | – |
| 18  | 0      | 0                 | 0                 | 0                  | 0                 | 0                 | 1            | 0     | 0     | 0.13      | –          | –       | –    | –               | –            | – |
| 19  | 0      | 0                 | 0                 | 0                  | 0                 | 0                 | 2            | 0     | 0     | 0.27      | –          | –       | –    | –               | –            | – |
| 20  | 0      | 0                 | 0                 | 0                  | 0                 | 0                 | 1            | 0     | 0     | 0.13      | –          | –       | –    | –               | –            | – |
| 21  | 0      | 0                 | 0                 | 0                  | 0                 | 1                 | 1            | 0     | 0     | 0.27      | –          | –       | –    | –               | –            | – |
| 22  | 0      | 0                 | 0                 | 0                  | 0                 | 0                 | 1            | 0     | 1     | 0.15      | –          | –       | –    | –               | –            | – |
| 23  | 0      | 0                 | 0                 | 0                  | 0                 | 0                 | 2            | 0     | 1     | 0.28      | –          | –       | –    | –               | –            | – |
| 24  | 0      | 0                 | 0                 | 0                  | 0                 | 1                 | 0            | 0     | 0     | 0.13      | –          | –       | –    | –               | –            | – |
| 25  | 0      | 0                 | 0                 | 0                  | 0                 | 0                 | 0            | 0     | 0     | 0.00      | –          | –       | –    | –               | –            | – |

|               |      |      |      |      |       |       |       |      |      |      |      |              |      |      |      |      |
|---------------|------|------|------|------|-------|-------|-------|------|------|------|------|--------------|------|------|------|------|
| 26            | 0    | 0    | 0    | 0    | 0     | 0     | 1     | 0    | 0    | 0.13 | –    | –            | –    | –    | –    | –    |
| 27            | 0    | 0    | 0    | 0    | 0     | 1     | 1     | 0    | 0    | 0.27 | –    | –            | –    | –    | –    | –    |
| 28            | 0    | 0    | 0    | 0    | 0     | 0     | 0     | 0    | 0    | 0.00 | –    | –            | –    | –    | –    | –    |
| 29            | 0    | 0    | 0    | 1    | 1     | 0     | 1     | 0    | 0    | 0.40 | –    | –            | –    | –    | –    | –    |
| 30            | 0    | 0    | 1    | 0    | 0     | 1     | 1     | 0    | 1    | 0.47 | –    | –            | –    | –    | –    | –    |
| 31            | 0    | 0    | 0    | 0    | 0     | 0     | 0     | 0    | 0    | 0.00 | –    | –            | –    | –    | –    | –    |
| 32            | 0    | 0    | 0    | 0    | 0     | 0     | 0     | 0    | 0    | 0.00 | –    | –            | –    | –    | –    | –    |
| 33            | 0    | 0    | 0    | 0    | 1     | 0     | 0     | 0    | 0    | 0.13 | –    | –            | –    | –    | –    | –    |
| 34            | 0    | 0    | 0    | 0    | 0     | 0     | 1     | 0    | 0    | 0.13 | –    | –            | –    | –    | –    | –    |
| 35            | 0    | 0    | 0    | 0    | 0     | 0     | 2     | 0    | 0    | 0.27 | –    | –            | –    | –    | –    | –    |
| 36            | 0    | 0    | 0    | 0    | 0     | 0     | 0     | 0    | 0    | 0.00 | –    | –            | –    | –    | –    | –    |
| 37            | 0    | 0    | 0    | 0    | 0     | 0     | 0     | 0    | 0    | 0.00 | –    | –            | –    | –    | –    | –    |
| 38            | 0    | 0    | 0    | 0    | 0     | 0     | 0     | 0    | 0    | 0.00 | –    | –            | –    | –    | –    | –    |
| 39            | 0    | 0    | 0    | 0    | 0     | 0     | 1     | 0    | 0    | 0.13 | –    | –            | –    | –    | –    | –    |
| 40            | 0    | 0    | 0    | 0    | 0     | 1     | 1     | 1    | 0    | 0.17 | –    | Positi<br>ve | –    | –    | –    | –    |
| 41            | 0    | 0    | 0    | 0    | 0     | 1     | 1     | 0    | 0    | 0.27 | –    | –            | –    | –    | –    | –    |
| 42            | 0    | 0    | 0    | 0    | 0     | 0     | 0     | 0    | 0    | 0.00 | –    | –            | –    | –    | –    | –    |
| Frequency (%) | 0.0% | 0.0% | 4.8% | 7.1% | 14.3% | 23.8% | 63.3% | 2.4% | 9.5% | 0.13 | 0.0% | 2.4%         | 0.0% | 0.0% | 0.0% | 0.0% |
